# Supplementary material
Source: PubMed Central journal article supplement (PMC3404751)
Supplement: NIHMS389560-supplement-1_si_001.pdf [file NIHMS389560-supplement-1_si_001.pdf]

1 **Supporting Information (SI)**

2 **Neutrophil Chemotaxis against a Competing Gradient**  
3 **of Chemoattractants: Hierarchy and Contribution of**  
4 **Each Chemoattractants**

5 *Donghyuk Kim, and Christy L. Haynes\**

6 Department of Chemistry, University of Minnesota, 207 Pleasant Street SE, Minneapolis, Minnesota,  
7 55455, United States

8 \* To whom correspondence should be addressed.

9 E-mail: [chaynes@umn.edu](mailto:chaynes@umn.edu), Tel: +1 612-626-1096

10

11

12

13

14

15

1 A. Supplemental Figures

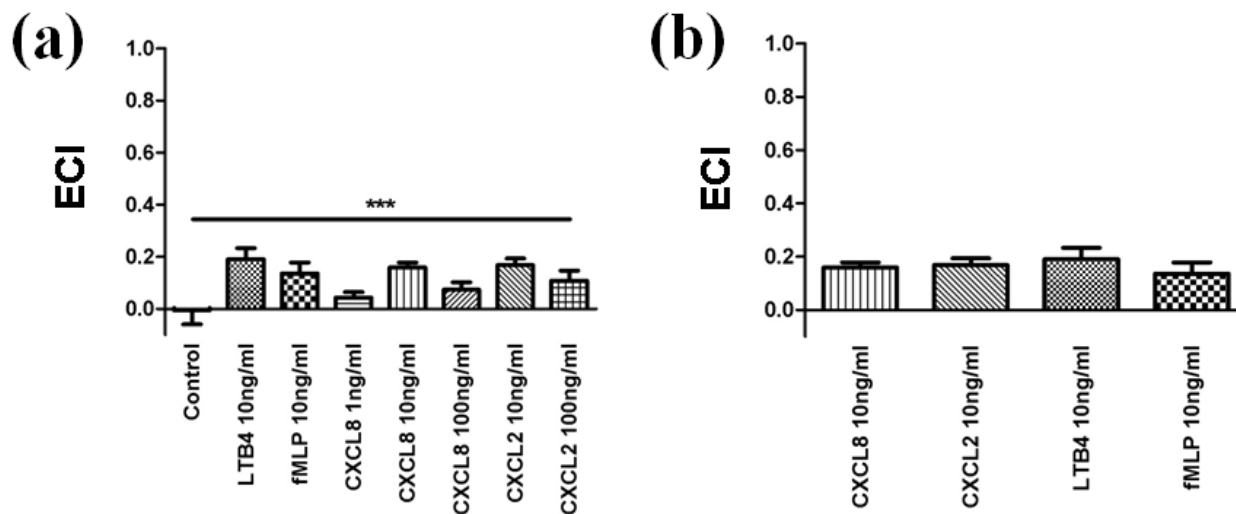

2

3 **Figure S-1.** ECIs for different gradients of the four chemoattractants. (a) ECIs for the control and all  
4 gradient conditions investigated, (b) ECIs for the 10 ng/mL gradient of the four chemoattractants (\*\*\*: p  
5 < 0.0001 by Kruskal-Wallis test).

6

7

8

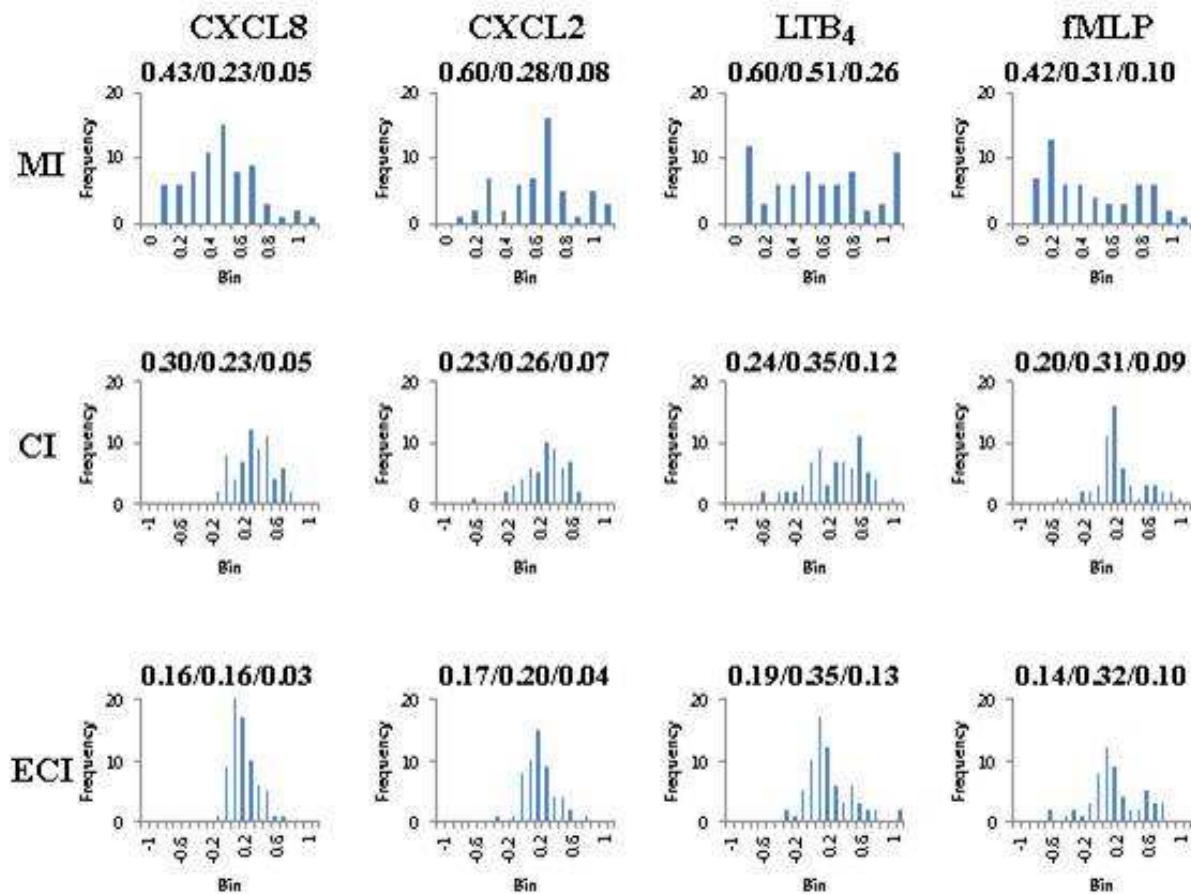

1

2 **Figure S-2.** Histograms for MIs, CIs, and ECIs from single gradient conditions (numbers above each  
 3 histogram represent mean/standard deviation/variance).

4

5

6

7

8

9

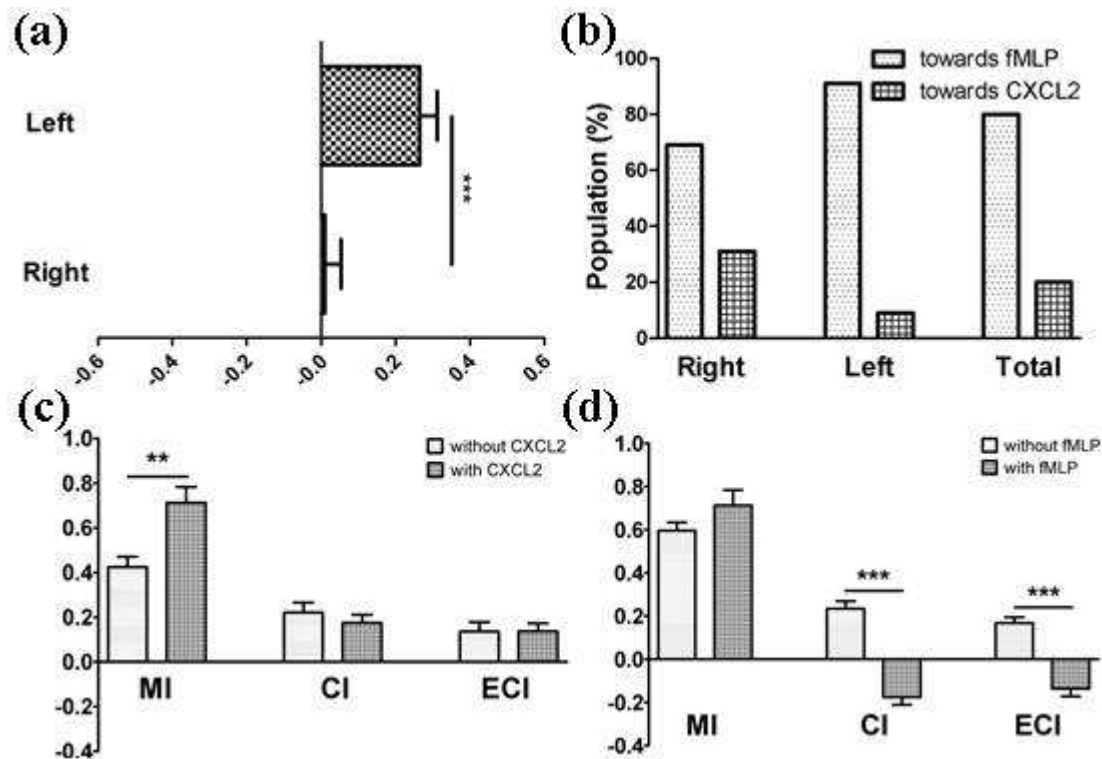

1

2

3

4

5

6

7

8

9

10

11

12

13

14

15

16

17

**Figure S-3.** Results from CXCL2-fMLP-mediated chemotaxis. (a) ECIs from each side of the channel with  $N_{\text{left}} = 30$  and  $N_{\text{right}} = 31$  (positive sign indicates that the chemotaxis was toward fMLP while negative sign indicates that the chemotaxis was toward CXCL2), (b) Populations of the cells moving toward a chemoattractant, (c) MI, CI, and ECI comparison to those from fMLP-mediated chemotaxis (positive sign indicates that the chemotaxis was toward fMLP while negative sign indicates that the chemotaxis was toward CXCL2), and (d) MI, CI, and ECI comparison to those from CXCL2-mediated chemotaxis (positive sign indicates that the chemotaxis was toward CXCL2 while negative sign indicates that the chemotaxis was toward fMLP).

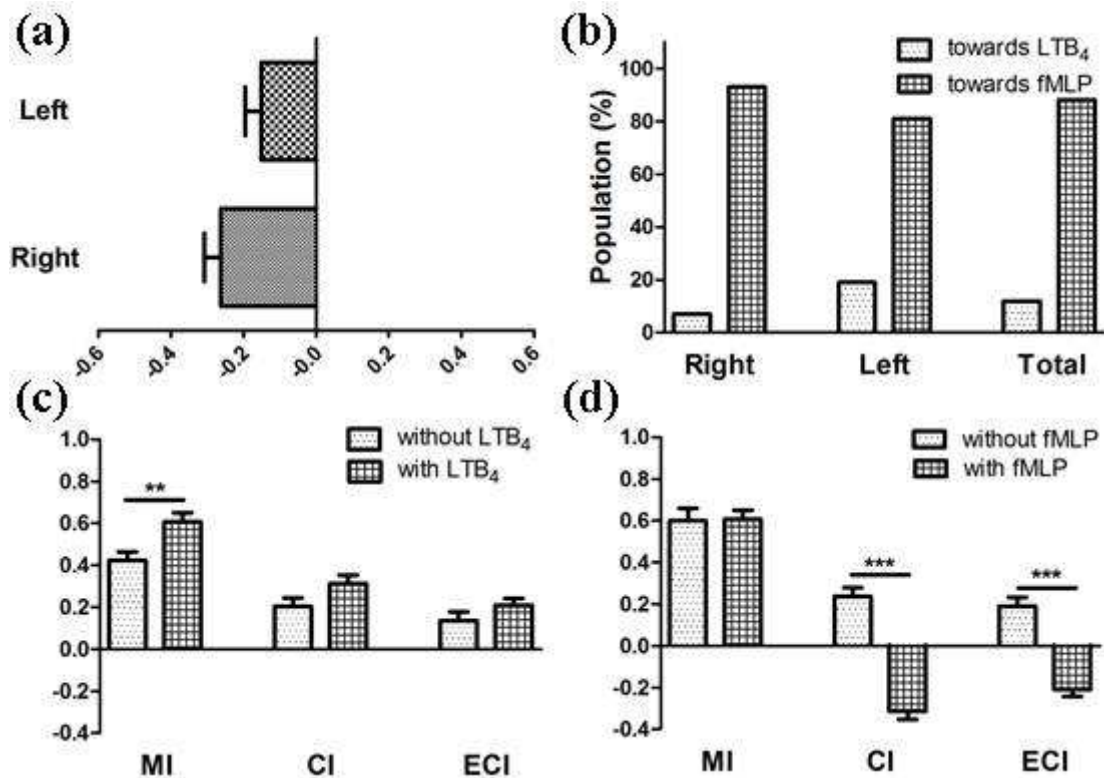

1

2 **Figure S-4.** Results from LTB<sub>4</sub>-fMLP-mediated chemotaxis. (a) ECIs from each side of the channel  
 3 with  $N_{\text{left}} = 30$  and  $N_{\text{right}} = 30$  (positive sign indicates that the chemotaxis was toward LTB<sub>4</sub> while  
 4 negative sign indicates that the chemotaxis was toward fMLP), (b) Populations of the cells moving  
 5 toward a chemoattractant, (c) MI, CI, and ECI comparison to those from fMLP-mediated chemotaxis  
 6 (positive sign indicates that the chemotaxis was toward fMLP while negative sign indicates that the  
 7 chemotaxis was toward LTB<sub>4</sub>), and (d) MI, CI, and ECI comparison to those from LTB<sub>4</sub>-mediated  
 8 chemotaxis (positive sign indicates that the chemotaxis was toward LTB<sub>4</sub> while negative sign indicates  
 9 that the chemotaxis was toward fMLP).

10

11

12

13

14

15

16

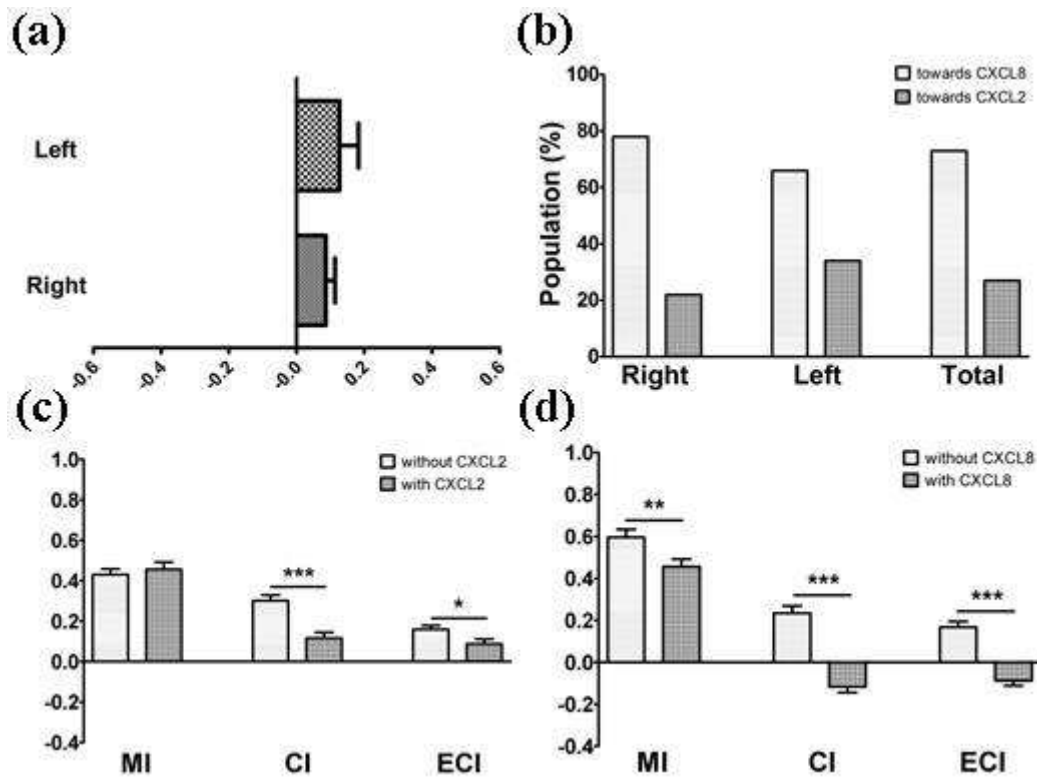

1

2 **Figure S-5.** Results from CXCL2-CXCL8-mediated chemotaxis. (a) ECIs from each side of the  
 3 channel with  $N_{\text{left}} = 35$  and  $N_{\text{right}} = 33$  (positive sign indicates that the chemotaxis was toward CXCL8  
 4 while negative sign indicates that the chemotaxis was toward CXCL2), (b) Populations of the cells  
 5 moving toward a chemoattractant, (c) MI, CI, and EI comparison to those from CXCL8-mediated  
 6 chemotaxis (positive sign indicates that the chemotaxis was toward CXCL8 while negative sign  
 7 indicates that the chemotaxis was toward CXCL2), and (d) MI, CI, and EI comparison to those from  
 8 CXCL2-mediated chemotaxis (positive sign indicates that the chemotaxis was toward CXCL2 while  
 9 negative sign indicates that the chemotaxis was toward CXCL8).

10

11

12

13

14

15

16

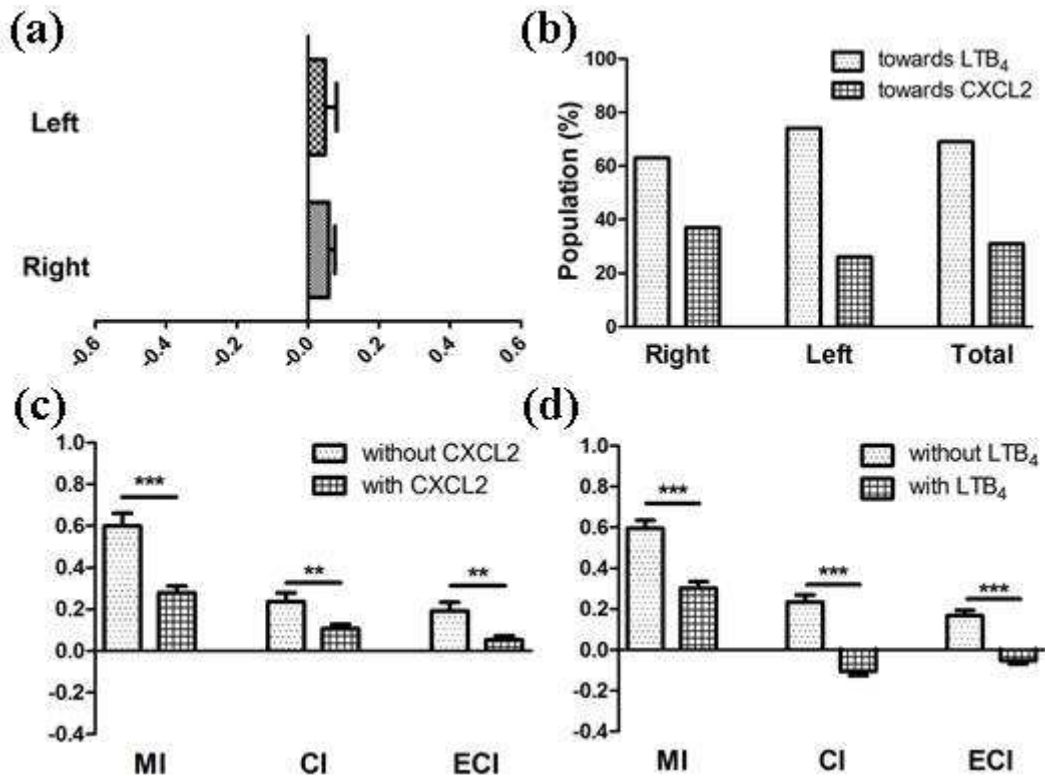

1

2 **Figure S-6.** Results from CXCL2-LTB<sub>4</sub>-mediated chemotaxis. (a) ECIs from each side of the channel  
 3 with  $N_{\text{left}} = 30$  and  $N_{\text{right}} = 31$  (positive sign indicates that the chemotaxis was toward LTB<sub>4</sub> while  
 4 negative sign indicates that the chemotaxis was toward CXCL2), (b) Populations of the cells moving  
 5 toward a chemoattractant, (c) MI, CI, and ECI comparison to those from LTB<sub>4</sub>-mediated chemotaxis  
 6 (positive sign indicates that the chemotaxis was toward LTB<sub>4</sub> while negative sign indicates that the  
 7 chemotaxis was toward CXCL2), and (d) MI, CI, and ECI comparison to those from CXCL2-mediated  
 8 chemotaxis (positive sign indicates that the chemotaxis was toward CXCL2 while negative sign  
 9 indicates that the chemotaxis was toward LTB<sub>4</sub>).

10

11

12

13

14

15

16

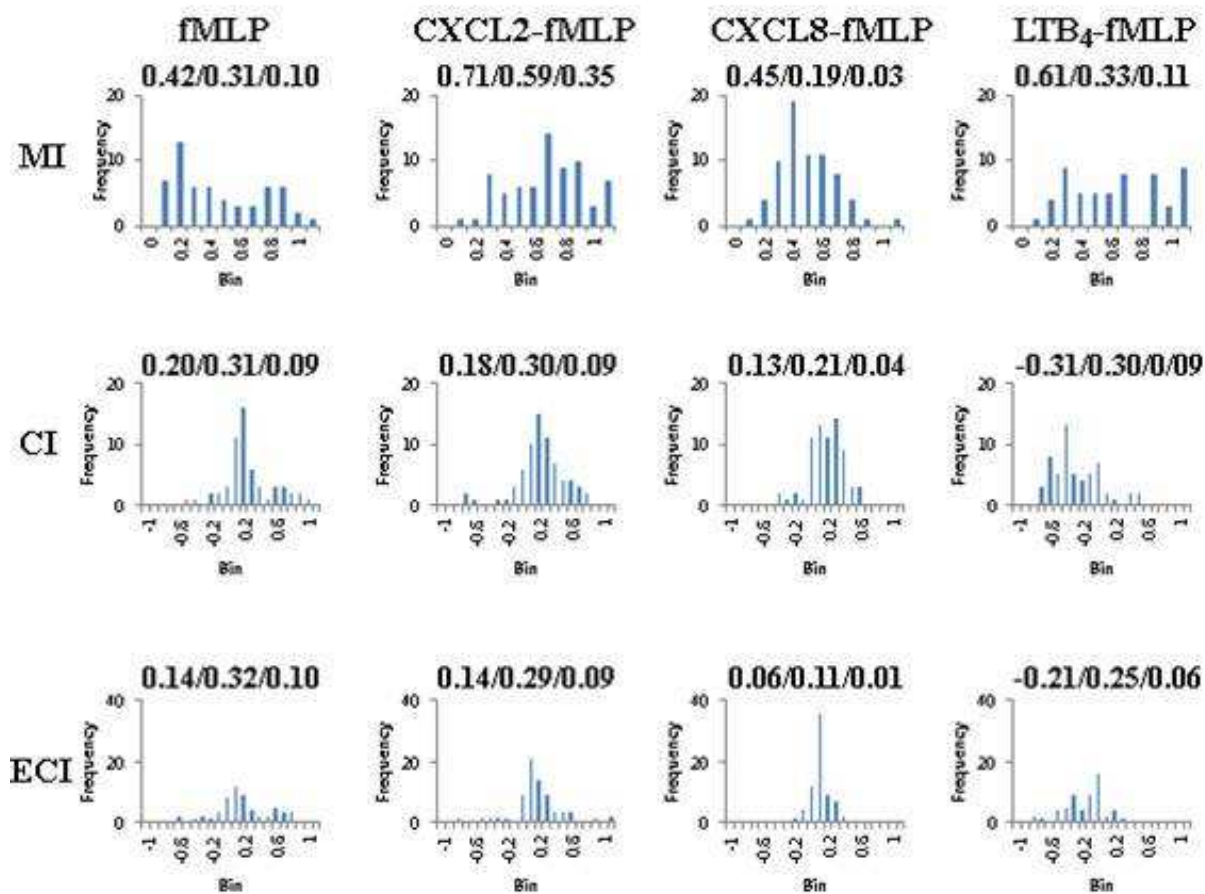

1  
2  
3  
4  
5  
6  
7  
8  
9

**Figure S-7.** Histograms for MIs, CIs, and ECIs from fMLP-containing gradient conditions (numbers above each histogram represent mean/standard deviation/variance).



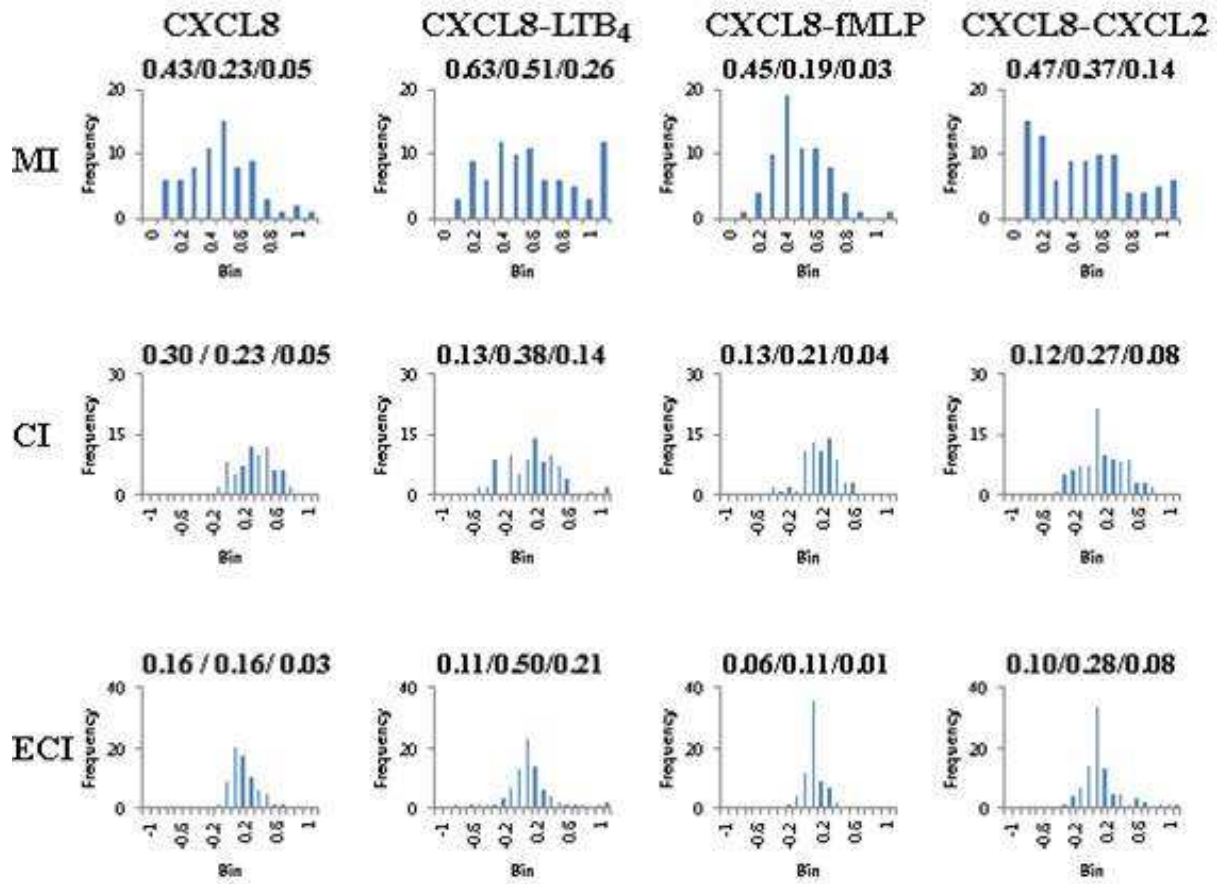

1  
2  
3  
4  
5  
6  
7  
8  
9

**Figure S-8.** Histograms for MIs, CIs, and ECIs from CXCL8-containing gradient conditions (numbers above each histogram represent mean/standard deviation/variance).

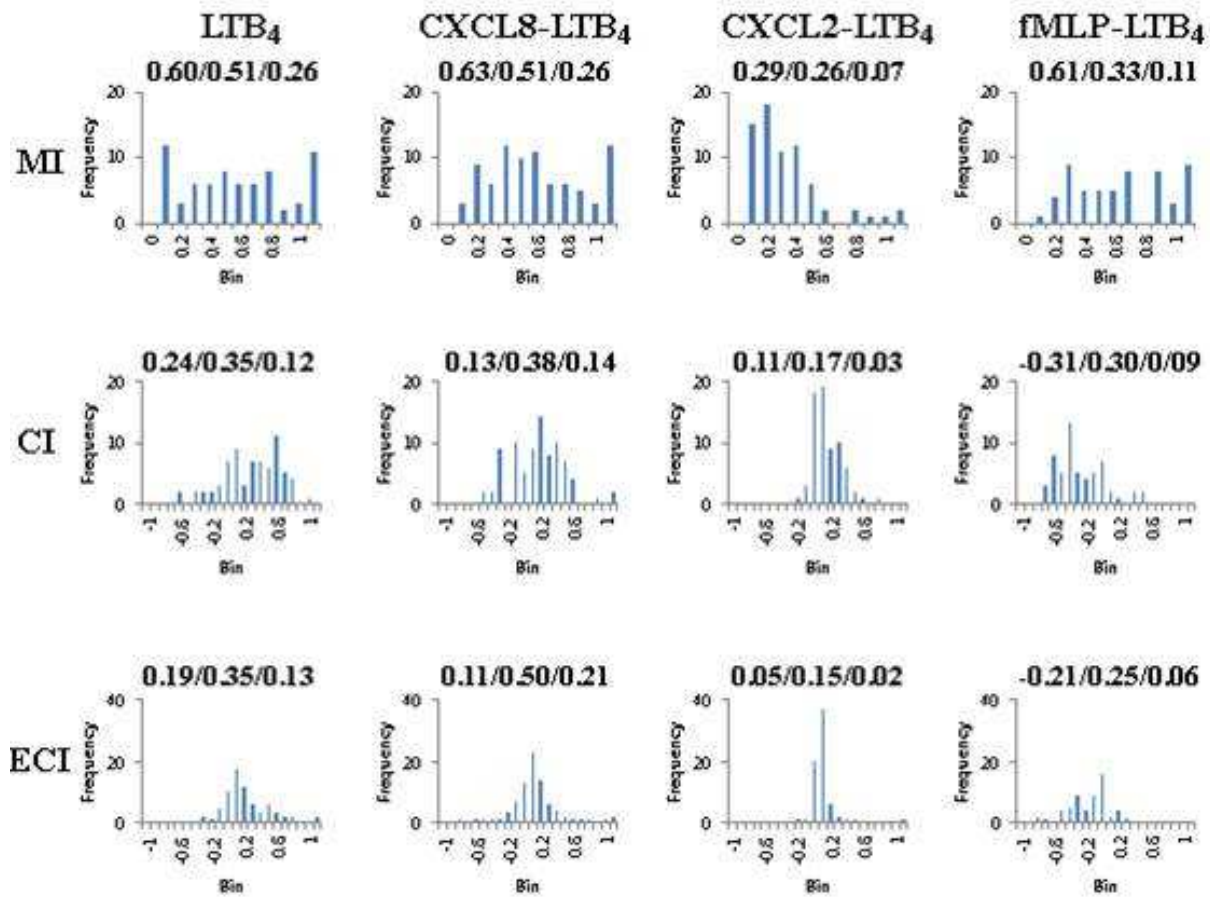

1

2 **Figure S-9.** Histograms for MIs, CIs, and ECIs from LTB<sub>4</sub>-containing gradient conditions (numbers  
 3 above each histogram represent mean/standard deviation/variance).

4

5

6

7

8

9

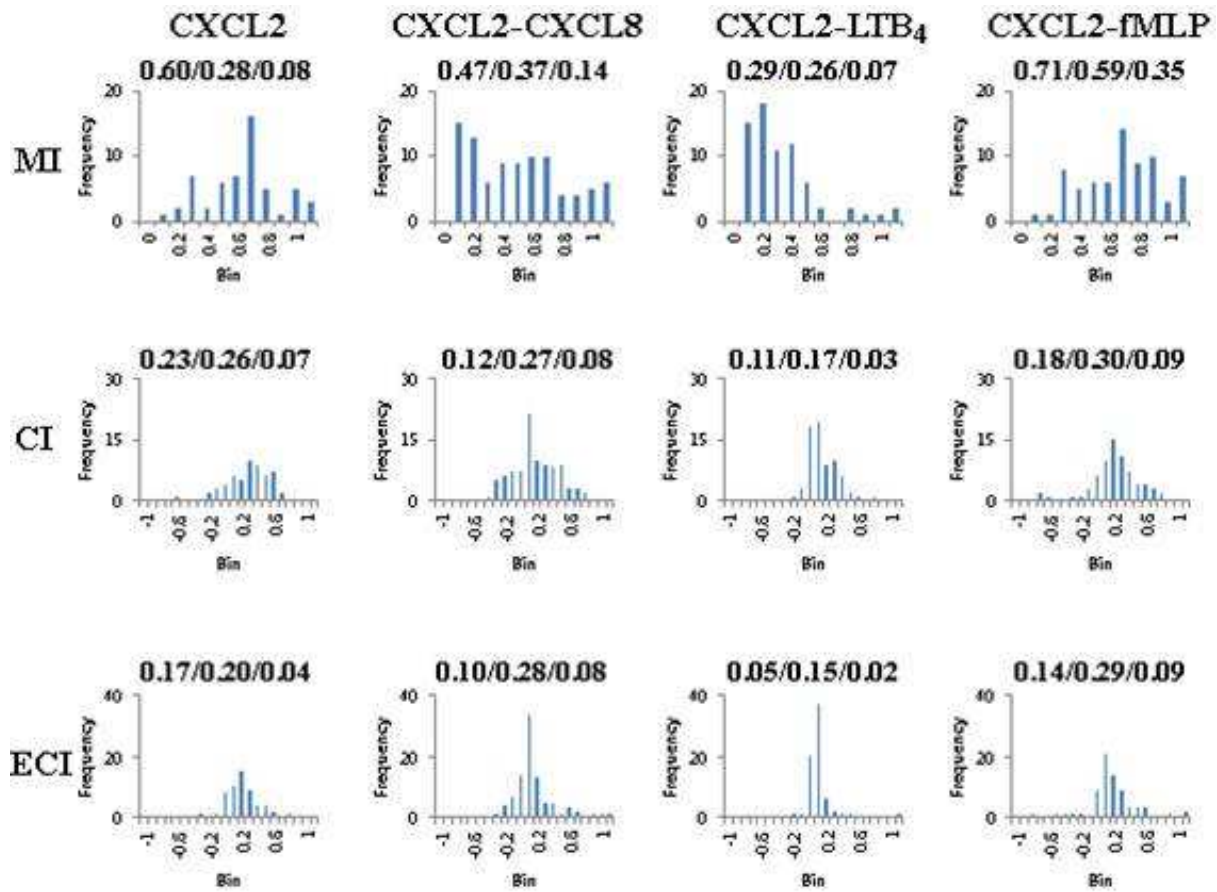

1

2 **Figure S-10.** Histograms for MIs, CIs, and ECIs from CXCL2-containing gradient conditions  
 3 (numbers above each histogram represent mean/standard deviation/variance).

4

5
